# Supplementary material for: A water-soluble bithiophene with increased photoluminescence efficiency and metal recognition ability
Source: Royal Society of Chemistry journal article supplement (doi:10.1039/d0dt01385d), 2020-01-01
Supplement: d0dt01385d1.pdf [file d0dt01385d1.pdf]

## SUPPORTING INFORMATION

### A water-soluble bithiophene with increased photoluminescence efficiency and metal recognition ability

Estefanía Delgado-Pinar\*<sup>a</sup>, Marta Pineiro <sup>a</sup> and J. Sérgio Seixas de Melo <sup>a</sup>

<sup>a</sup>CQC, Department of Chemistry, University of Coimbra, Rua Larga, 3004-535

\*Corresponding author: Estefanía Delgado-Pinar

e-mail: [edelgado@qui.uc.pt](mailto:edelgado@qui.uc.pt)

#### Table of Contents

**Figure S1.** <sup>1</sup>H NMR spectrum of **α2-Cl**

**Figure S2.** <sup>13</sup>C NMR spectrum of **α2-Cl**

**Figure S3.** HSQC NMR spectrum of **α2-Cl**

**Figure S4.** <sup>1</sup>H NMR spectrum of **α2-tbS**

**Figure S5.** DEPT spectrum of **α2-tbS**

**Figure S6.** HMBC spectrum of **α2-tbS**

**Figure S7.** Mass spectrum of **α2-tbS**

**Figure S8.** Normalized absorption and fluorescence emission spectra in different solvents for **α2-tbS** at T = 293K

**Figure S9.** Absorbance of **α2-tbS** recorded at 298.1 ± 0.1 K as function of pH

**Scheme S1** Equations for cumulative and stepwise constants

**Figure S10.** Fluorescence decays of **α2-tbS** in water a) pH = 2.70 and b) pH = 12.53 at T=293 K

**Figure S11.** Fluorescence decays of **α2-tbS** in a) methanol and b) dioxane at T=293 K

**Figure S12.** Fluorescence emission intensity vs pH curves recorded in water for **α2-tbS** (L) after the addition of an excess of the corresponding metal

**Figure S13.** Bar diagram representation of the percentage of response relative to the fluorescence intensity of **α2-tbS** at 402 nm (% I 402 nm) upon addition of divalent metal ions at pH 7.6 and 9.5

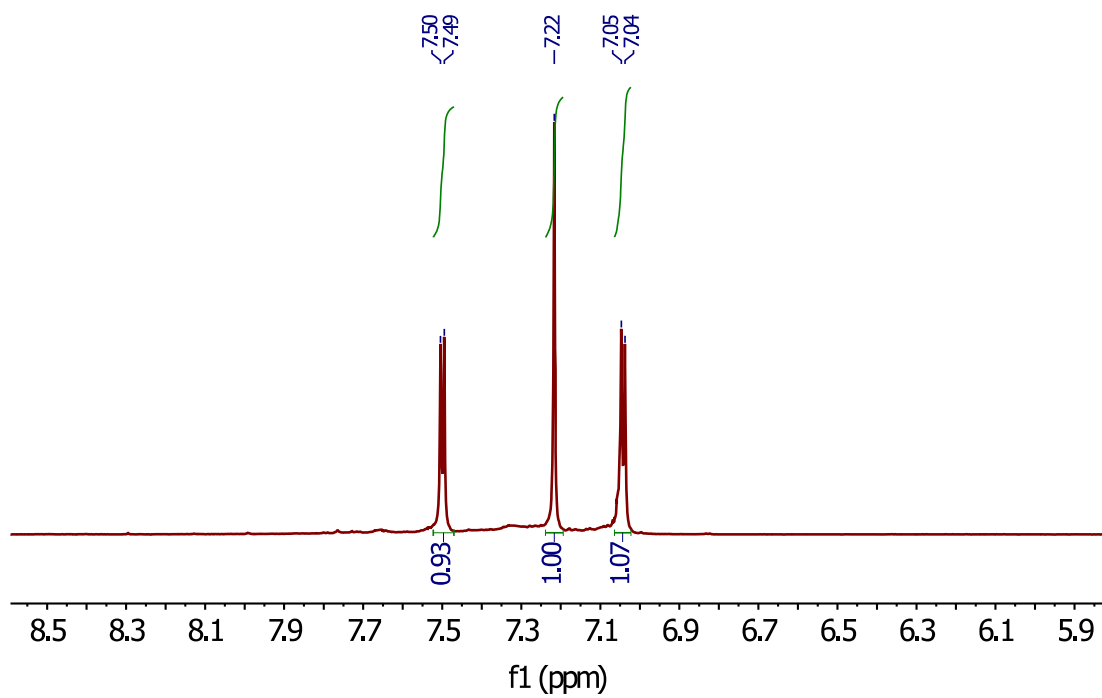

**Figure S1.** <sup>1</sup>H NMR spectrum of  $\alpha 2$ -Cl

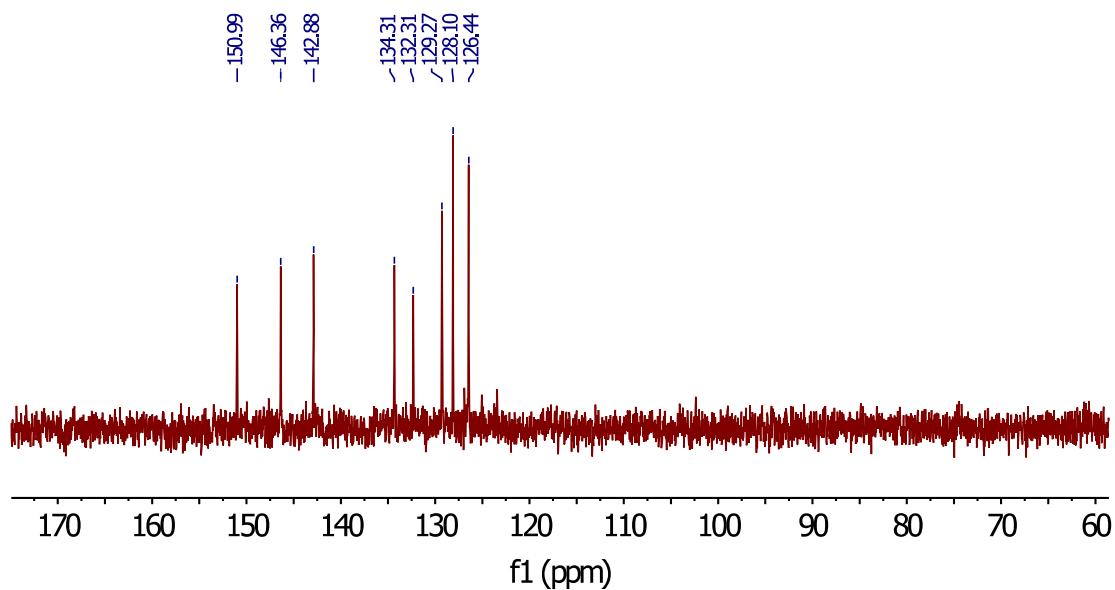

**Figure S2.** <sup>13</sup>C NMR spectrum of  $\alpha 2$ -Cl

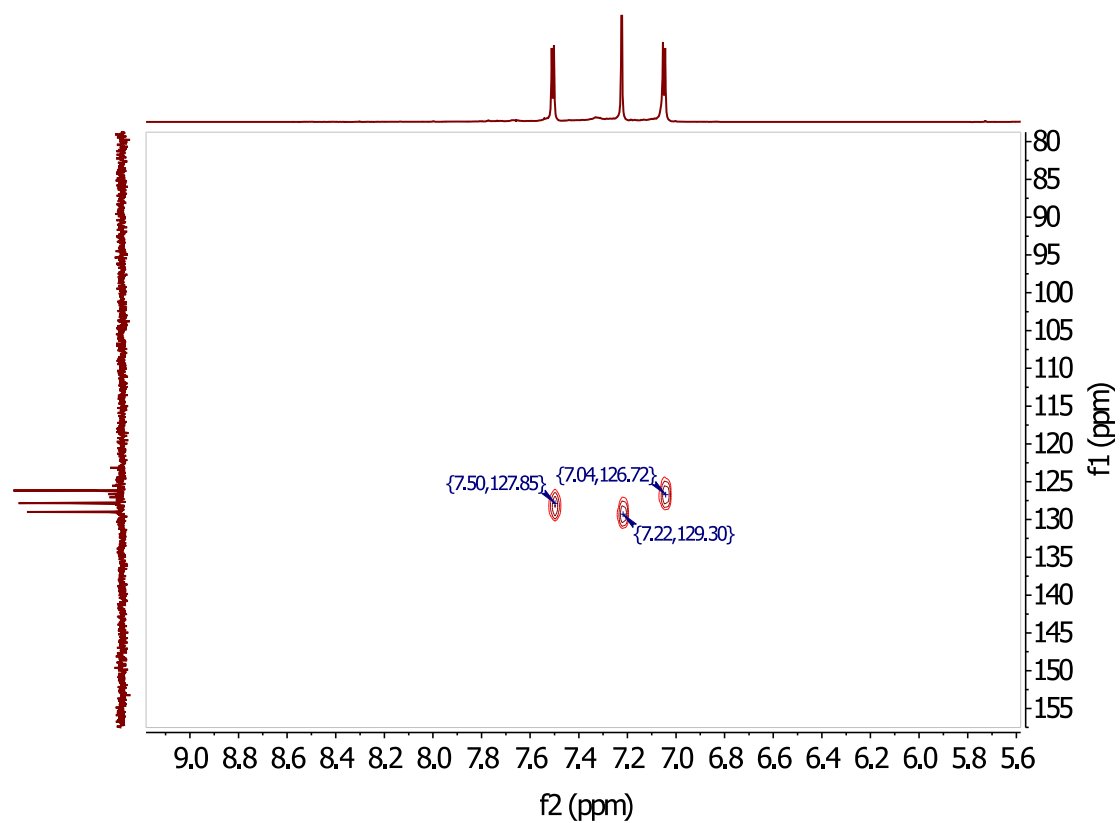

**Figure S3.** HSQC NMR spectrum of  $\alpha 2$ -Cl

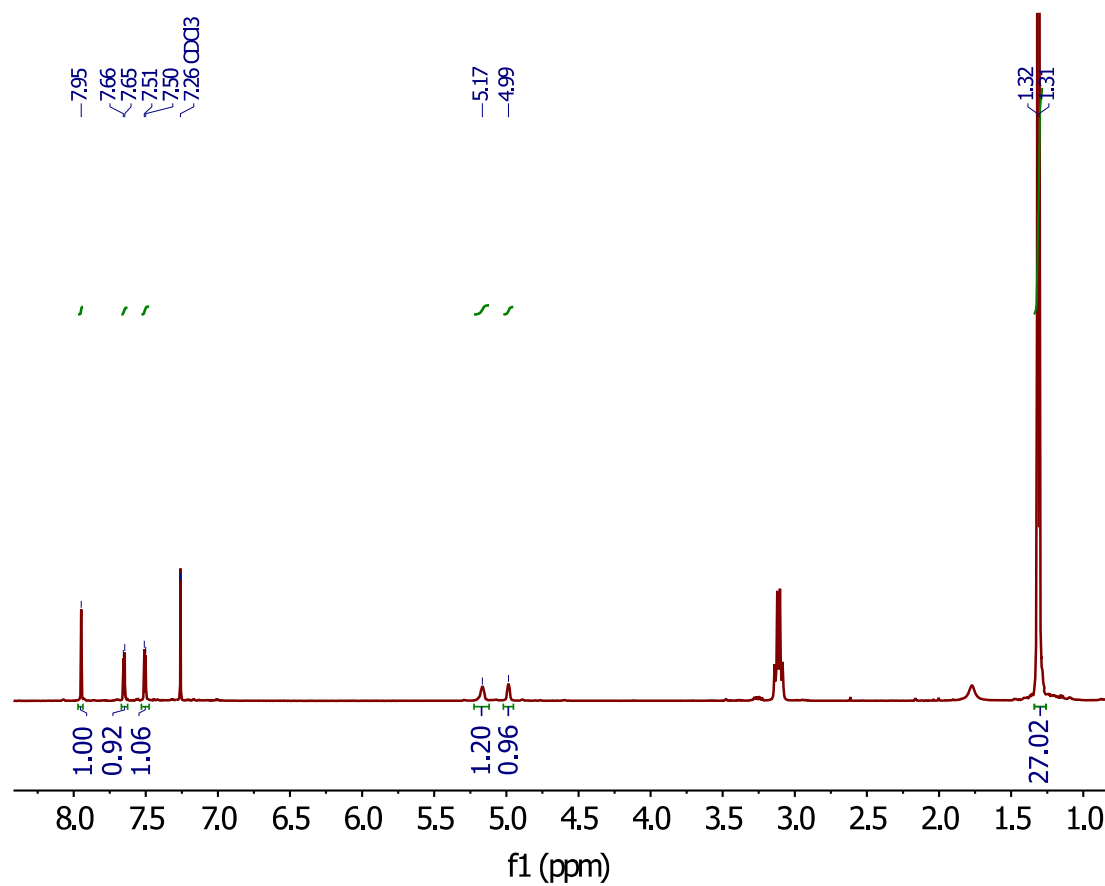

**Figure S4.** <sup>1</sup>H NMR spectrum of  $\alpha$ 2-tbS

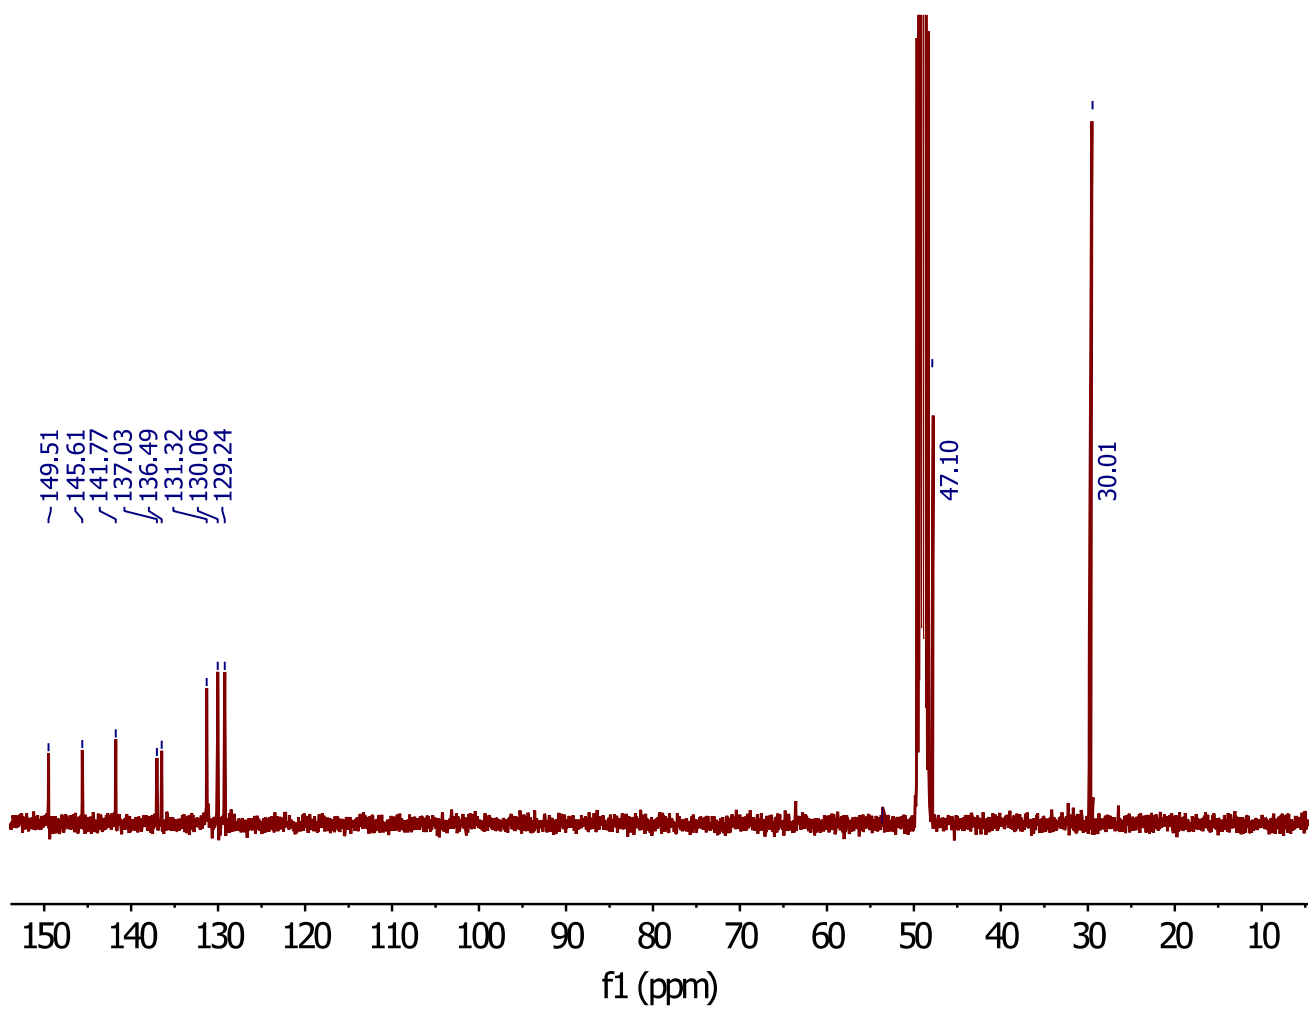

**Figure S5.**  $^{13}\text{C}$  NMR spectrum of  $\alpha 2\text{-tbS}$

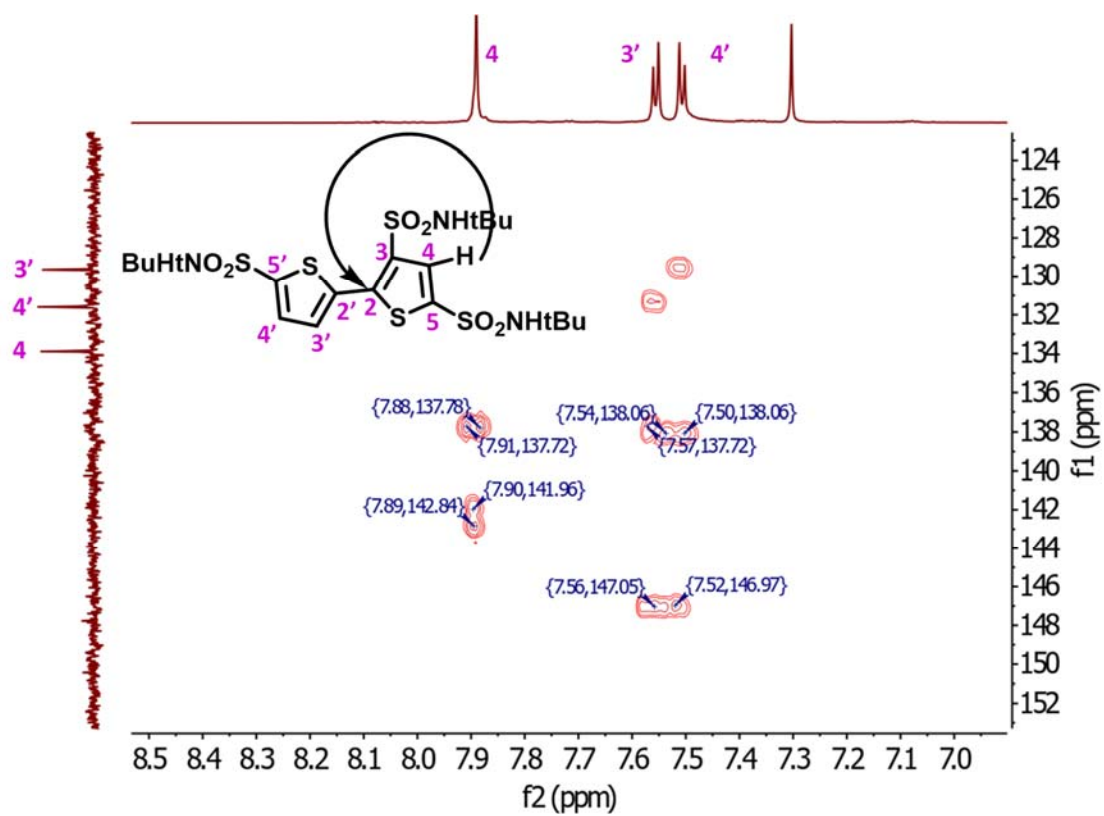

Figure S6. HMBC spectrum of  $\alpha 2$ -tbS

Sample Name **a2-tb**  
Comment

Instrument micrOTOF

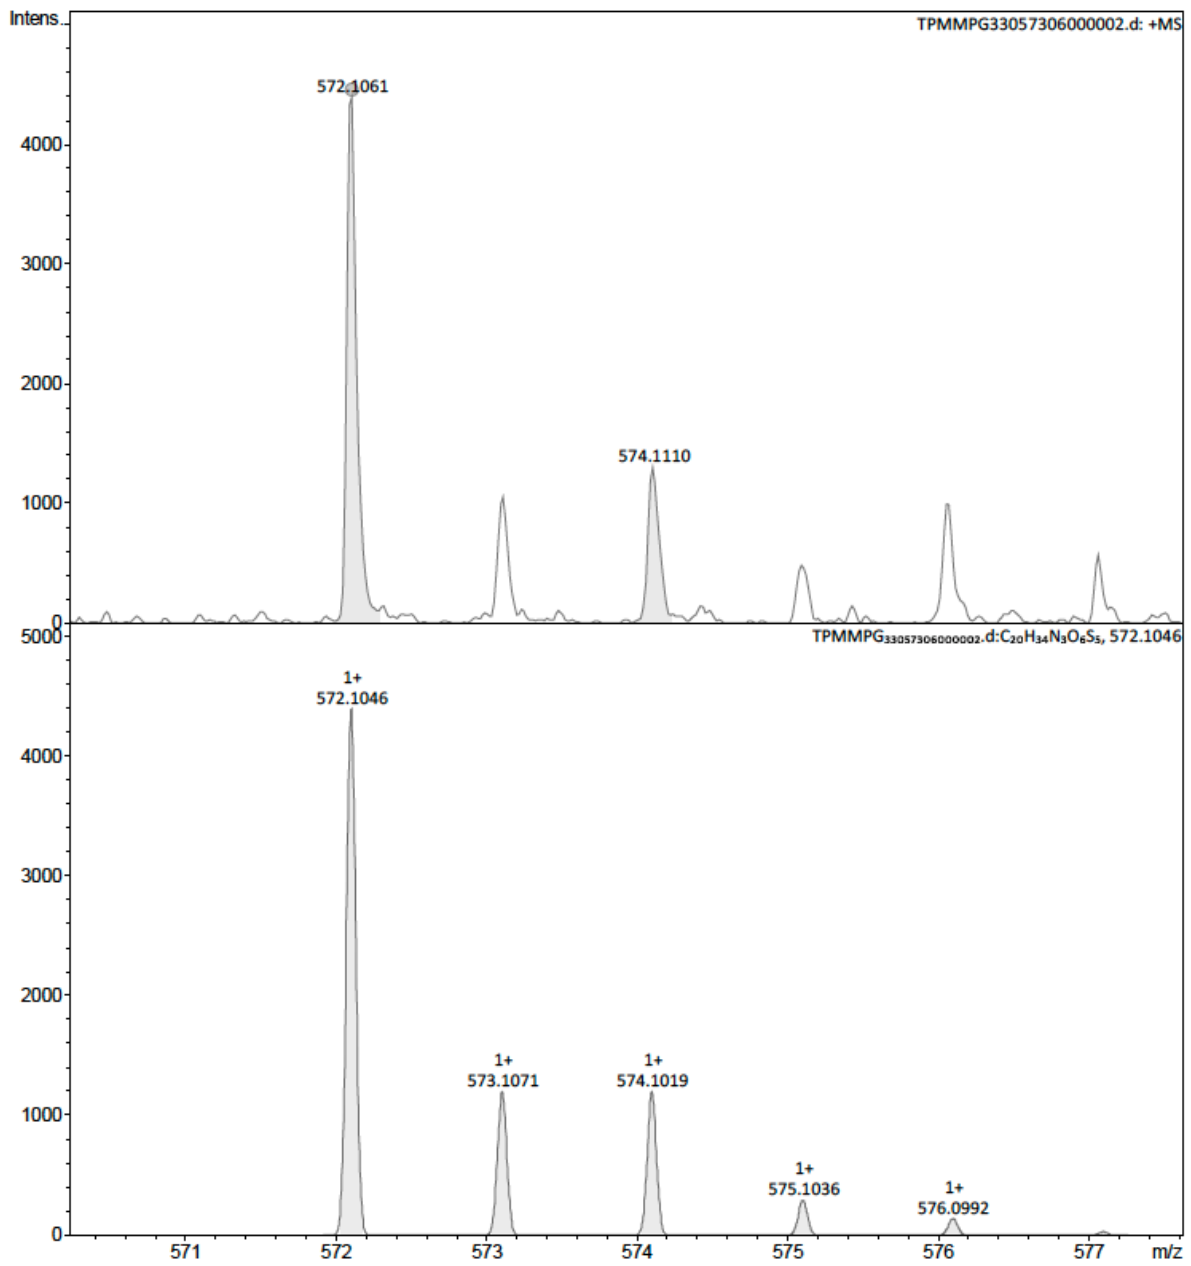

**Figure S7.** Mass spectrum of  $\alpha 2$ -tbS

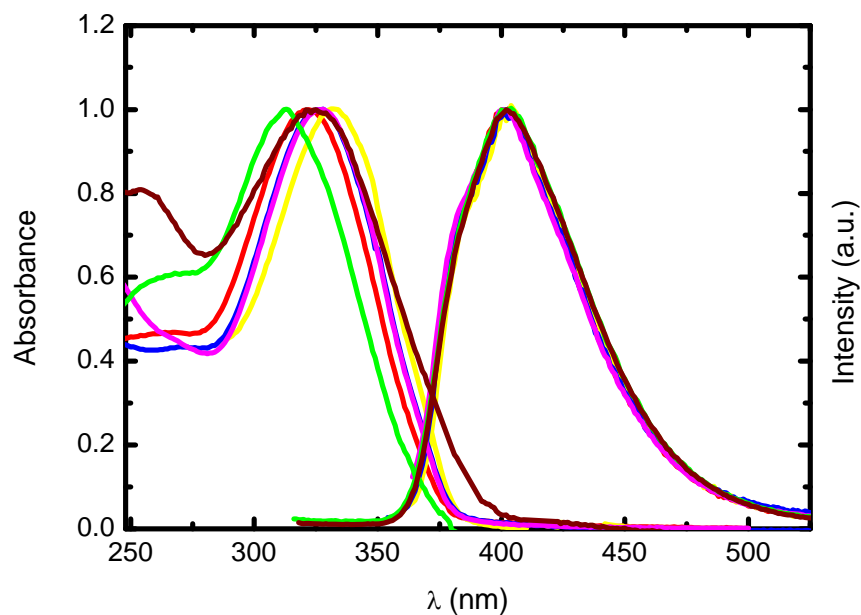

**Figure S8.** Normalized absorption and fluorescence emission spectra in dioxane (blue), methanol (red), 2-methyltetrahydrofuran (pink), dimethylformamide (yellow) and water at two pH's (acidic pH = 0.35 (green), and basic pH  $\approx$  13 (brown)) solutions for  $\alpha$ 2-tbS at T = 293K

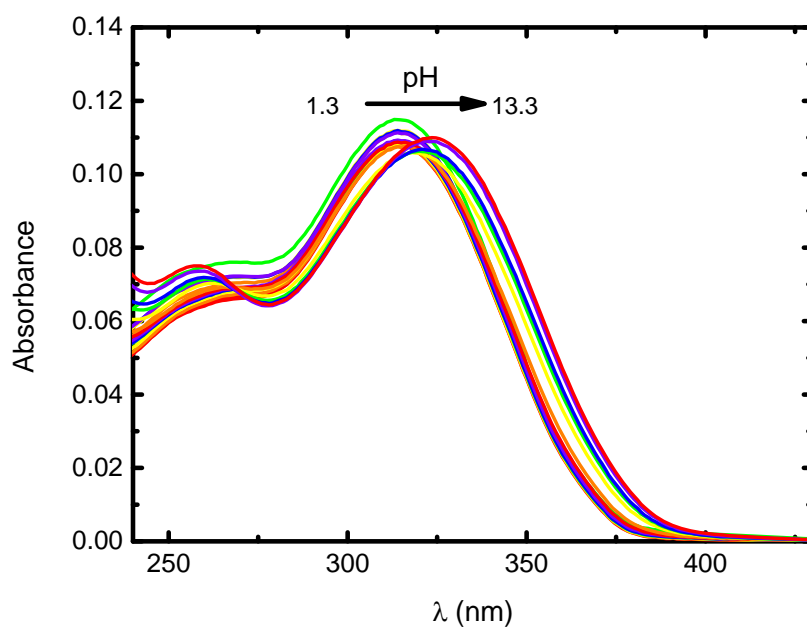

**Figure S9.** Absorbance of  $\alpha$ 2-tbS recorded at  $298.1 \pm 0.1$  K as function of pH



**Scheme S1.** Equations for cumulative and stepwise constants. A cumulative or overall constant, given the symbol  $\beta$ , is the equilibrium constant for the formation of a complex from reagents, and can always be expressed as the product of stepwise constants. A stepwise constant refers to the formation of the species one step at a time. In the case of  $p\beta_{13}$  for  $\alpha 2\text{-tbS}$ :

*Stepwise constants for the triprotonated  $\alpha 2\text{-tbS}$*

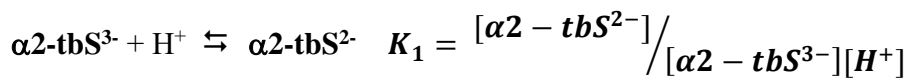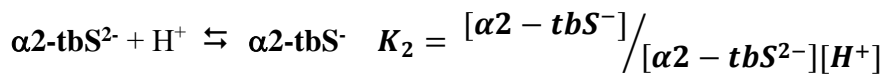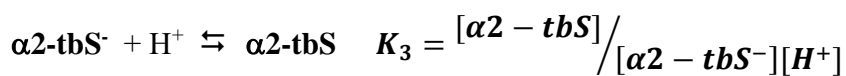

*Cumulative constant for the triprotonated  $\alpha 2\text{-tbS}$*

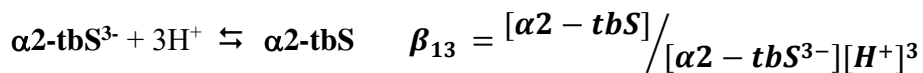

Being  $p\beta_{13} = \log K_1 + \log K_2 + \log K_3$

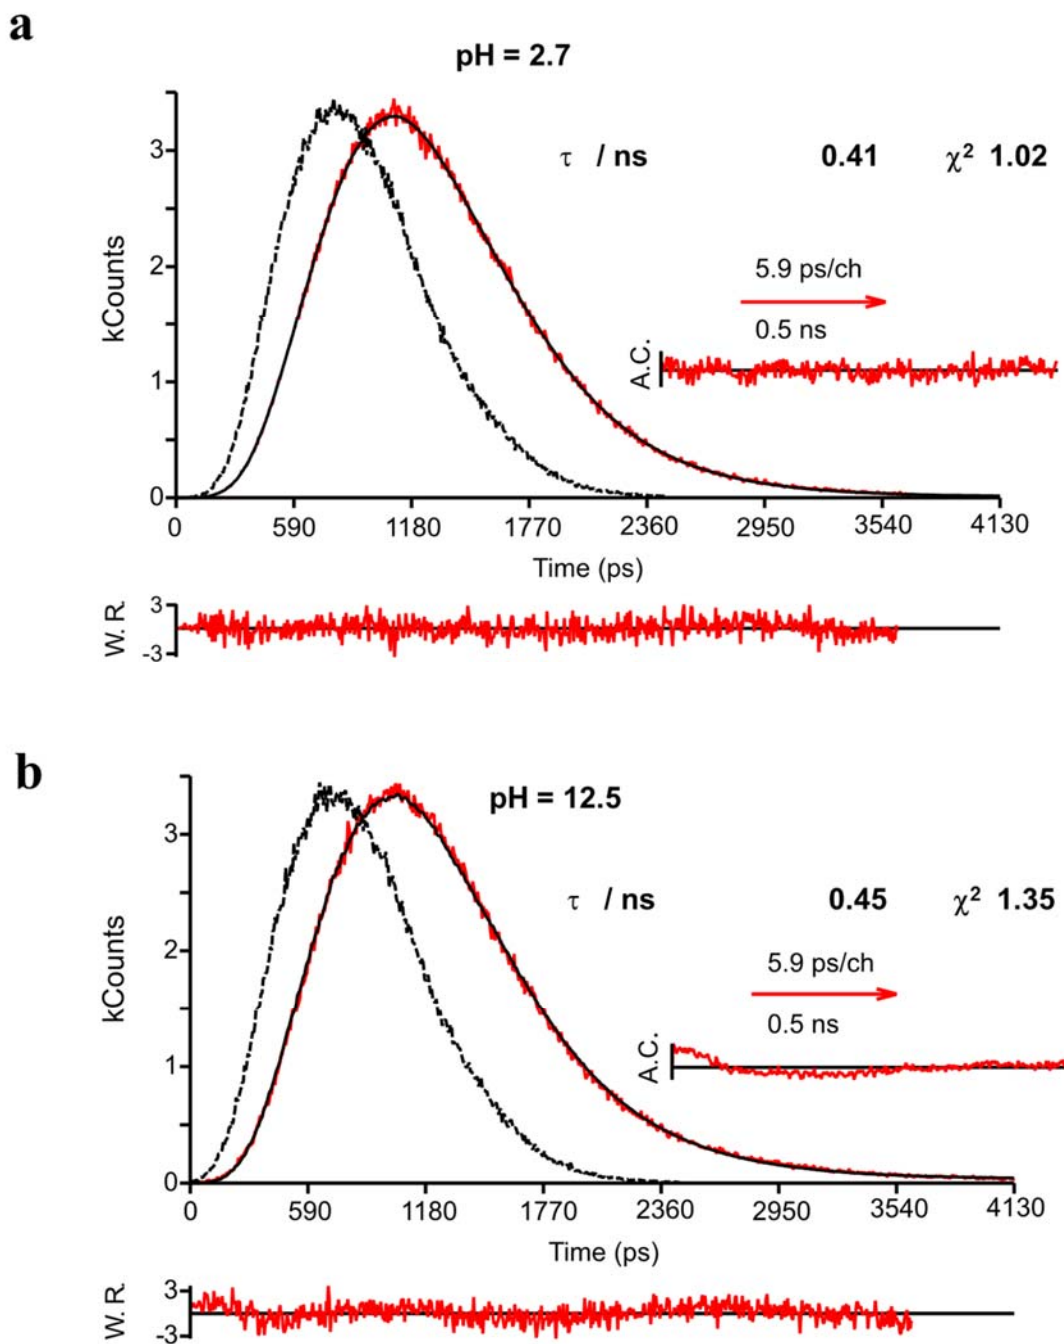

**Figure S10.** Fluorescence decays of  $\alpha 2$ -tbS in water a) pH = 2.7 and b) pH = 12.5 at T=293 K. The fluorescence decay times ( $\tau_i$ ) are presented as insets. The dashed line in the decays is the pulse IRF. For a better judgment of the quality of the fits, the weighted residuals (WRs), autocorrelation functions (ACs), and chi-squared ( $\chi^2$ ) values are also shown

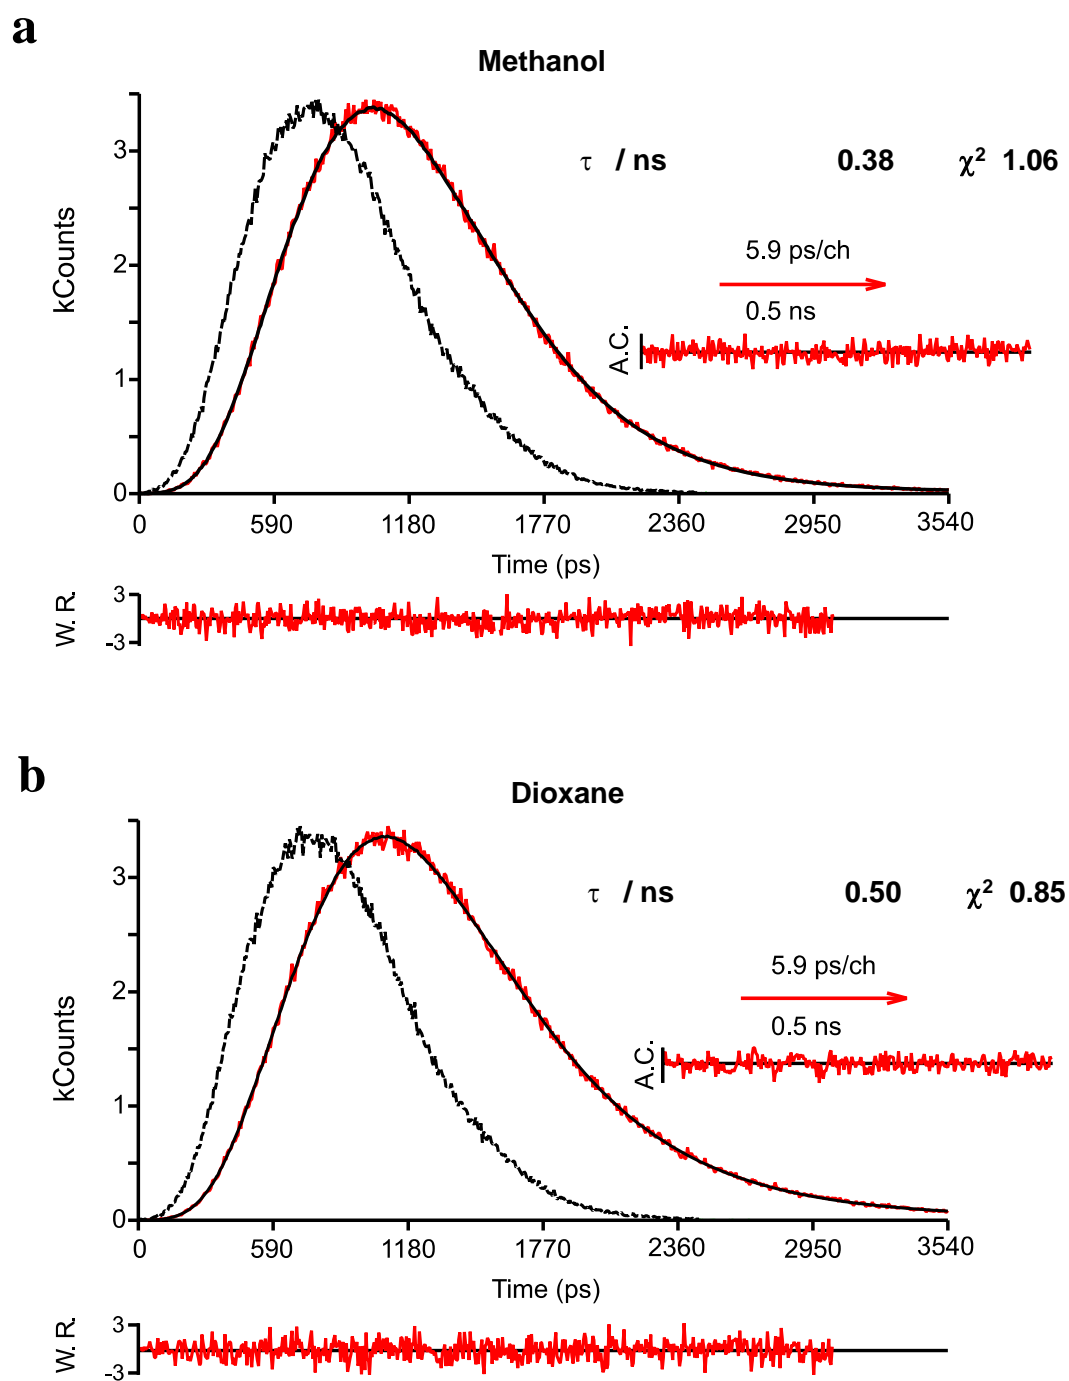

**Figure S11.** Fluorescence decays of  $\alpha 2$ -tbS in a) methanol and b) dioxane at T=293 K. The fluorescence decay times ( $\tau_i$ ) are presented as insets. The dashed line in the decays is the pulse IRF. For a better judgment of the quality of the fits, the weighted residuals (WRs), autocorrelation functions (ACs), and chi-squared ( $\chi^2$ ) values are also shown

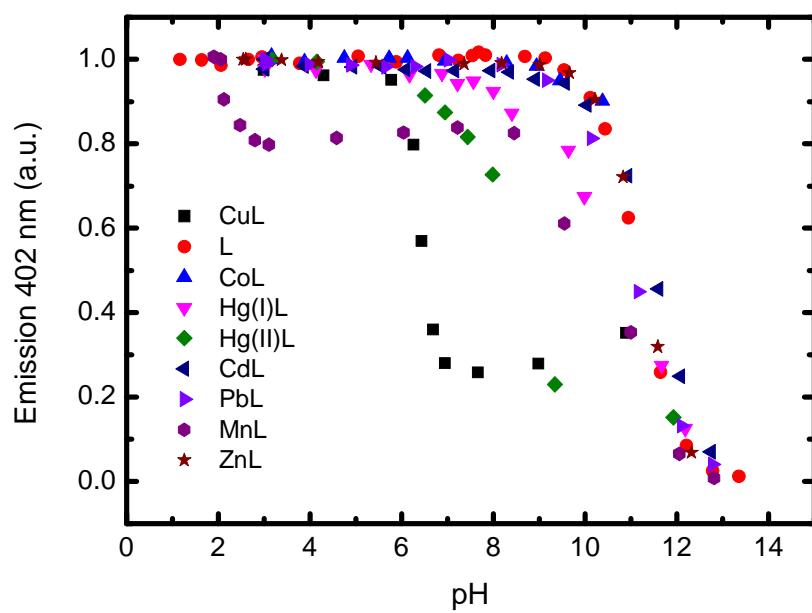

**Figure S12.** Fluorescence emission intensity *vs* pH curves recorded in water for  $\alpha 2$ -tbS (L) after the addition of an excess of the corresponding metal.  $[\alpha 2$ -tbS] =  $1.3 \times 10^{-5}$  M;  $\lambda_{exc}$  = 317 nm

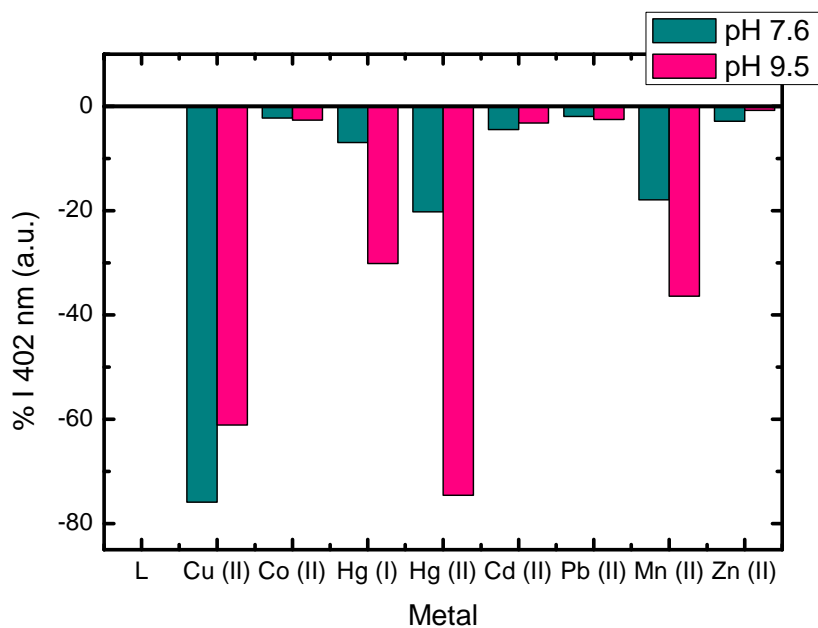

**Figure S13.** Bar diagram representation of the percentage of response relative to the fluorescence intensity of  $\alpha 2$ -tbS at 402 nm (% I 402 nm) upon addition of divalent metal ions at pH 7.6 and 9.5. In the yy'-axes the fluorescence of the free ligand is leveled to 0. Titrations performed in water at  $T = 298 \text{ K}$ ,  $[\alpha 2\text{-tbS}] = 1.3 \times 10^{-5} \text{ M}$  with  $\lambda_{\text{exc}} = 317 \text{ nm}$
